# Supplementary material for: Antibody responses to SARS-CoV-2 in patients with COVID-19
Source: Springer Nature journal article supplement (doi:10.1038/s41591-020-0897-1), 2020-04-29
Supplement: 41591_2020_897_MOESM1_ESM.pdf [file 41591_2020_897_MOESM1_ESM.pdf]

In the format provided by the authors and unedited.

# Antibody responses to SARS-CoV-2 in patients with COVID-19

Quan-Xin Long <sup>1,13</sup>, Bai-Zhong Liu<sup>2,13</sup>, Hai-Jun Deng <sup>1,13</sup>, Gui-Cheng Wu<sup>3,4,13</sup>, Kun Deng<sup>5,13</sup>, Yao-Kai Chen<sup>6,13</sup>, Pu Liao<sup>7</sup>, Jing-Fu Qiu<sup>8</sup>, Yong Lin <sup>1</sup>, Xue-Fei Cai<sup>1</sup>, De-Qiang Wang<sup>1</sup>, Yuan Hu<sup>1</sup>, Ji-Hua Ren<sup>1</sup>, Ni Tang<sup>1</sup>, Yin-Yin Xu<sup>2</sup>, Li-Hua Yu<sup>2</sup>, Zhan Mo<sup>2</sup>, Fang Gong<sup>2</sup>, Xiao-Li Zhang<sup>2</sup>, Wen-Guang Tian<sup>2</sup>, Li Hu<sup>2</sup>, Xian-Xiang Zhang<sup>3,4</sup>, Jiang-Lin Xiang<sup>3,4</sup>, Hong-Xin Du<sup>3,4</sup>, Hua-Wen Liu<sup>3,4</sup>, Chun-Hui Lang<sup>3,4</sup>, Xiao-He Luo<sup>3,4</sup>, Shao-Bo Wu<sup>3,4</sup>, Xiao-Ping Cui<sup>3,4</sup>, Zheng Zhou<sup>3,4</sup>, Man-Man Zhu<sup>5</sup>, Jing Wang<sup>6</sup>, Cheng-Jun Xue<sup>6</sup>, Xiao-Feng Li<sup>6</sup>, Li Wang<sup>6</sup>, Zhi-Jie Li<sup>7</sup>, Kun Wang<sup>7</sup>, Chang-Chun Niu<sup>7</sup>, Qing-Jun Yang<sup>7</sup>, Xiao-Jun Tang<sup>8</sup>, Yong Zhang <sup>8</sup>, Xia-Mao Liu<sup>9</sup>, Jin-Jing Li<sup>9</sup>, De-Chun Zhang<sup>10</sup>, Fan Zhang<sup>10</sup>, Ping Liu<sup>11</sup>, Jun Yuan<sup>1</sup>, Qin Li<sup>12</sup>, Jie-Li Hu <sup>1</sup> , Juan Chen <sup>1</sup>  and Ai-Long Huang <sup>1</sup> 

<sup>1</sup>Key Laboratory of Molecular Biology on Infectious Diseases, Ministry of Education, Chongqing Medical University, Chongqing, China. <sup>2</sup>Yongchuan Hospital Affiliated to Chongqing Medical University, Chongqing, China. <sup>3</sup>Chongqing University Three Gorges Hospital, Chongqing, China. <sup>4</sup>Chongqing Three Gorges Central Hospital, Chongqing, China. <sup>5</sup>The Third Hospital Affiliated to Chongqing Medical University, Chongqing, China. <sup>6</sup>Division of Infectious Diseases, Chongqing Public Health Medical Center, Chongqing, China. <sup>7</sup>Laboratory Department, Chongqing People's Hospital, Chongqing, China. <sup>8</sup>School of Public Health and Management, Chongqing Medical University, Chongqing, China. <sup>9</sup>The Second Affiliated Hospital of Chongqing Medical University, Chongqing, China. <sup>10</sup>Wanzhou People's Hospital, Chongqing, China. <sup>11</sup>BioScience Co. Ltd, Chongqing, China. <sup>12</sup>Chongqing Center for Disease Control and Prevention, Chongqing, China. <sup>13</sup>These authors contributed equally: Quan-Xin Long, Bai-Zhong Liu, Hai-Jun Deng, Gui-Cheng Wu, Kun Deng, Yao-Kai Chen. ✉e-mail: [102564@cqmu.edu.cn](mailto:102564@cqmu.edu.cn); [chenjuan2014@cqmu.edu.cn](mailto:chenjuan2014@cqmu.edu.cn); [ahuang@cqmu.edu.cn](mailto:ahuang@cqmu.edu.cn)

## Supplemental Information

**Supplementary Table 1. Baseline characteristics of patients from the cross-sectional study.**

|                                        | Number (%)  |            |                 | <i>p</i> value  |
|----------------------------------------|-------------|------------|-----------------|-----------------|
|                                        | All (N=285) | ICU (N=39) | Non-ICU (N=246) |                 |
| Age - years (median, IQR)              | 47 (37-56)  | 54 (46-77) | 46 (36-55)      | <b>1.63E-04</b> |
| Gender                                 |             |            |                 |                 |
| Female                                 | 127 (44.6%) | 18 (46.2%) | 109 (44.3%)     | 0.863           |
| Male                                   | 158 (55.4%) | 21 (53.8%) | 137 (55.7%)     |                 |
| Epidemiologic history                  |             |            |                 |                 |
| From Wuhan                             | 115 (40.3%) | 15 (38.5%) | 100 (40.6%)     | 0.243           |
| close contacts                         | 135 (47.4%) | 16 (41.0%) | 119 (48.4%)     |                 |
| Unknown                                | 35 (12.3%)  | 8 (20.5%)  | 27 (11.0%)      |                 |
| Incubation period - days (median, IQR) | 8 (5-12)    | 9 (8-10)   | 7 (5-12)        | 0.586           |
| Comorbidities                          |             |            |                 |                 |
| Hypertension                           | 41 (14.4%)  | 7 (17.9%)  | 34 (13.8%)      | 0.468           |
| Cardiovascular disease                 | 9 (3.2%)    | 3 (7.7%)   | 6 (2.4%)        | 0.111           |
| Diabetes                               | 22 (7.7%)   | 7 (17.9%)  | 15 (6.1%)       | <b>0.019</b>    |
| Malignancy                             | 3 (1.1%)    | 1 (2.6%)   | 2 (0.8%)        | 0.358           |
| COPD                                   | 4 (1.4%)    | 2 (5.1%)   | 2 (0.8%)        | 0.092           |
| Chronic kidney disease                 | 2 (0.7%)    | 0 (0.0%)   | 2 (0.8%)        | 1               |
| Chronic liver disease                  | 17 (6.0%)   | 5 (12.8%)  | 12 (4.9%)       | 0.066           |
| Hyoxemia                               | 4 (1.4%)    | 2 (5.1%)   | 2 (0.8%)        | 0.092           |
| Tuberculosis                           | 6 (2.1%)    | 1 (2.6%)   | 5 (2.0%)        | 0.59            |
| Total                                  | 87 (30.5%)  | 19 (48.7%) | 68 (27.6%)      | <b>0.014</b>    |
| Signs and symptoms                     |             |            |                 |                 |
| Fever                                  | 168 (58.9%) | 24 (61.5%) | 144 (58.5%)     | 0.861           |
| Fatigue                                | 79 (27.7%)  | 20 (51.3%) | 59 (24.0%)      | <b>8.52E-04</b> |
| Dry cough                              | 157 (55.1%) | 22 (56.1%) | 135 (54.9%)     | 0.864           |
| Anorexia                               | 66 (23.2%)  | 18 (46.2%) | 48 (19.5%)      | <b>7.56E-04</b> |
| Myalgia                                | 35 (12.3%)  | 5 (12.8%)  | 30 (12.2%)      | 1               |
| Dypnea                                 | 19 (6.7%)   | 14 (35.9%) | 5 (2.0%)        | <b>5.76E-10</b> |
| Expectoration                          | 66 (23.2%)  | 14 (35.9%) | 52 (21.1%)      | 0.064           |
| Pharyngalgia                           | 30 (10.5%)  | 2 (5.1%)   | 28 (11.4%)      | 0.397           |
| Diarrhea                               | 25 (8.8%)   | 4 (10.3%)  | 21 (8.5%)       | 0.76            |
| Nausea                                 | 17 (6.0%)   | 4 (10.3%)  | 13 (5.3%)       | 0.265           |
| Dizziness                              | 24 (8.4%)   | 6 (15.4%)  | 18 (7.3%)       | 0.115           |
| Headache                               | 30 (10.5%)  | 4 (10.3%)  | 26 (10.6%)      | 1               |
| Vomiting                               | 7 (2.5%)    | 2 (5.1%)   | 5 (2.0%)        | 0.246           |
| Abdominal pain                         | 6 (2.1%)    | 2 (5.1%)   | 4 (1.6%)        | 0.192           |
| Chill                                  | 43 (15.1%)  | 7 (17.9%)  | 36 (14.6%)      | 0.63            |
| Nasal congestion                       | 10 (3.5%)   | 2 (5.1%)   | 8 (3.3%)        | 0.632           |

|                                             |                   |                   |                   |                 |
|---------------------------------------------|-------------------|-------------------|-------------------|-----------------|
| Rhinorrhea                                  | 13 (4.6%)         | 2 (5.1%)          | 11 (4.5%)         | 0.694           |
| Chest stuffiness                            | 42 (14.7%)        | 8 (20.5%)         | 34 (13.8%)        | 0.328           |
| Onset of symptom to (median day, IQR)       |                   |                   |                   |                 |
| Hospital admission                          | 6 (3-8)           | 7 (5-9)           | 5 (3-8)           | <b>0.024</b>    |
| Severe                                      | 8 (6-11)          | 8 (6-11)          | NA                | NA              |
| Heart rate (median bpm, IQR)                | 88 (80-97)        | 89 (84-96)        | 87 (78-97)        | 0.345           |
| Respiratory rate (median, IQR)              | 20 (20-21)        | 22 (20-25)        | 20 (20-21)        | <b>4.04E-04</b> |
| Mean arterial pressure, (median mm Hg, IQR) | 93.3 (85.7-103.3) | 94.9 (86.0-100.7) | 93.3 (85.9-103.5) | 0.809           |

---

COPD, chronic obstructive pulmonary disease.

Continuous variables were expressed as the median (interquartile range, IQR) and compared between ICU and non-ICU groups with the unpaired, two-sided Mann-Whitney U test. Categorical variables were expressed as numbers (%) and compared between ICU and non-ICU groups by the Fisher's exact test.

**Supplementary Table 2. Laboratory findings of the patients from the cross-sectional study on admission to hospital.**

|                                          | Median, IQR   |                     |                     |                       | <i>p</i> value  |
|------------------------------------------|---------------|---------------------|---------------------|-----------------------|-----------------|
|                                          | Normal Range  | All (N=285)         | severe (N=39)       | Non-severe (N=246)    |                 |
| White blood cell count, $\times 10^9$ /L | 3.5~9.5       | 5.3 (4.5-6.6)       | 6.3 (4.8-9.5)       | 5.2 (4.4-6.5)         | <b>6.70E-03</b> |
| Neutrophil count, $\times 10^9$ /L       | 1.8~6.3       | 3.5 (2.6-4.6)       | 4.6 (3.7-7.8)       | 3.4 (2.5-4.3)         | <b>1.19E-05</b> |
| Lymphocyte count, $\times 10^9$ /L       | 1.1~3.2       | 1.2 (0.9-1.6)       | 0.8 (0.6-1.1)       | 1.3 (1.0-1.6)         | <b>2.15E-07</b> |
| Monocyte count, $\times 10^9$ /L         | 0.1~0.6       | 0.4 (0.3-0.5)       | 0.4 (0.3-0.6)       | 0.4 (0.3-0.5)         | 7.74E-01        |
| Platelet count, $\times 10^9$ /L         | 125.00~350.00 | 210.0 (146.0-265.0) | 203.0 (129.0-297.5) | 210.5 (149.0-259.8.0) | 7.35E-01        |
| Prothrombin time, s                      | 8~14          | 11.4 (10.8-12.5)    | 11.7 (11.2-12.5)    | 11.3 (10.8-12.5)      | 9.41E-02        |
| Activated partial thromboplastin time, s | 20~40         | 30.0 (26.0-37.5)    | 29.3 (25.5-35.4)    | 30.0 (26.0-37.7)      | 6.52E-01        |
| D-dimer, mg/L                            | <0.55         | 0.4 (0.2-0.6)       | 0.7 (0.6-1.3)       | 0.3 (0.2-0.5)         | <b>1.64E-09</b> |
| Creatine kinase, U/L                     | 40~200        | 57.0 (39.3-92.3)    | 69.5 (39.8-128.8)   | 56.6 (39.4-86.5)      | 1.43E-01        |
| Lactate dehydrogenase, U/L               | 120~250       | 221.5 (168.0-266.8) | 332.5 (231.3-383.5) | 202.0 (162.3-251.0)   | <b>1.46E-09</b> |
| Alanine aminotransferase, U/L            | 7~40          | 22.7 (14.9-41.3)    | 32.3 (20.1-48.5)    | 22.0 (14.6-39.0)      | <b>3.00E-02</b> |
| Aspartate aminotransferase, U/L          | 13~35         | 23.7 (18.0-35.0)    | 32.0 (22.4-45.0)    | 22.7 (17.8-33.0)      | <b>2.42E-03</b> |
| Total bilirubin, $\mu$ mol/L             | 0~21          | 10.7 (7.1-16.8)     | 12.0 (8.2-16.9)     | 10.6 (7.0-16.7)       | 1.84E-01        |
| Creatinine, $\mu$ mol/L                  | 57~111        | 65.5 (56.0-79.0)    | 62.0 (53.5-72.5)    | 66.5 (57.0-80.0)      | 5.85E-02        |
| Hypersensitive troponinI, ng/mL          | 0.001~0.014   | 0.005 (0.004-0.008) | 0.007 (0.005-0.012) | 0.004 (0.003-0.006)   | <b>1.96E-03</b> |
| Procalcitonin, ng/mL                     | <0.046        | 0.050 (0.031-0.072) | 0.068 (0.048-0.100) | 0.050 (0.029-0.070)   | <b>7.70E-04</b> |
| C-reactive protein, mg/L                 | 0~5           | 9.1 (2.7-33.3)      | 18.8 (5.1-63.7)     | 8.0 (2.5-29.9)        | <b>8.09E-03</b> |

Continuous variables were expressed as the median (interquartile range, IQR) and compared

between severe and non-severe groups with the unpaired, two-sided Mann-Whitney U test.

**Supplementary Table 3. A summary of the CVs of the assay for the detection of SARS-CoV-2 specific IgG or IgM antibody from the reports of National Institutes for Food and Drug Control.**

| Antibody | CV of within-run | CV of between-run | Report number |
|----------|------------------|-------------------|---------------|
| IgM      | 4%               | 7%                | RZ202000929   |
| IgM      | 5%               | 7%                | RZ202000930   |
| IgM      | 5%               | 7%                | RZ202000931   |
| IgG      | 6%               | 6%                | RZ202000932   |
| IgG      | 6%               | 6%                | RZ202000933   |
| IgG      | 2%               | 6%                | RZ202000934   |
