# Supplementary material for: Antibody responses to SARS-CoV-2 in patients with COVID-19
Source: Springer Nature journal article supplement (doi:10.1038/s41591-020-0897-1), 2020-04-29
Supplement: MOESM4 [file 41591_2020_897_MOESM4_ESM.pdf]

**Source Data Figure 1C.**

| <b>Figure 1C</b>                              | <b>Test</b>            | <b>P-value</b> |
|-----------------------------------------------|------------------------|----------------|
| Severe vs. Non-severe (IgG during 8-14 days)  | Wilcoxon rank sum test | 0.001          |
| Severe vs. Non-severe (IgG during 15-21 days) | Wilcoxon rank sum test | 0.361          |
| Severe vs. Non-severe (IgM during 8-14 days)  | Wilcoxon rank sum test | 0.504          |
| Severe vs. Non-severe (IgM during 15-21 days) | Wilcoxon rank sum test | 0.338          |

| <b>one- or two-<br/>sided</b> | <b>Difference</b> | <b>95% CI of difference</b> |
|-------------------------------|-------------------|-----------------------------|
| two-sided                     | 16.532            | 3.050 to 35.804             |
| two-sided                     | 3.592             | -5.455 to 20.838            |
| two-sided                     | 0.469             | -0.963 to 2.691             |
| two-sided                     | 1.791             | -3.639 to 9.452             |
