# Supplementary material for: Antibody responses to SARS-CoV-2 in patients with COVID-19
Source: Springer Nature journal article supplement (doi:10.1038/s41591-020-0897-1), 2020-04-29
Supplement: MOESM5 [file 41591_2020_897_MOESM5_ESM.pdf]

**Source Data Extended Data Figure 1.**

| <b>Extended Data Figure 1C</b>                         | <b>Test</b>              | <b>P-value</b> |
|--------------------------------------------------------|--------------------------|----------------|
| Correlation between the two technical replicates (IgG) | Pearson correlation test | <0.001         |

| <b>Extended Data Figure 1D</b>                         | <b>Test</b>              | <b>P-value</b> |
|--------------------------------------------------------|--------------------------|----------------|
| Correlation between the two technical replicates (IgM) | Pearson correlation test | <0.001         |

| <b>Correlation</b> | <b>95% CI of Correlation</b> |
|--------------------|------------------------------|
| 0.996              | 0.993 to 0.998               |

| <b>Correlation</b> | <b>95% CI of Correlation</b> |
|--------------------|------------------------------|
| 0.997              | 0.995 to 0.998               |
