# Supplementary material for: Antibody responses to SARS-CoV-2 in patients with COVID-19
Source: Springer Nature journal article supplement (doi:10.1038/s41591-020-0897-1), 2020-04-29
Supplement: MOESM6 [file 41591_2020_897_MOESM6_ESM.pdf]

**Source Data Extended Data Figure 5.**

| <b>Extended Data Figure 5A</b> | <b>Test</b>            | <b>P-value</b> |
|--------------------------------|------------------------|----------------|
| Age < 60 vs. Age ≥ 60          | Wilcoxon rank sum test | 1.000          |

| <b>Extended Data Figure 5B</b>               | <b>Test</b>              | <b>P-value</b> |
|----------------------------------------------|--------------------------|----------------|
| Correlation between Lymphocyte count and IgG | Pearson correlation test | 0.165          |

| <b>Extended Data Figure 5C</b>  | <b>Test</b>              | <b>P-value</b> |
|---------------------------------|--------------------------|----------------|
| Correlation between CRP and IgG | Pearson correlation test | 0.064          |

| <b>Extended Data Figure 5D</b>            | <b>Test</b>              | <b>P-value</b> |
|-------------------------------------------|--------------------------|----------------|
| Correlation between Hospital stay and IgG | Pearson correlation test | 0.390          |

| <b>one- or two- sided</b> | <b>Difference</b> | <b>95% CI of difference</b> |
|---------------------------|-------------------|-----------------------------|
| two-sided                 | 0.121             | -51.785 to 20.443           |

| <b>Correlation</b> | <b>95% CI of Correlation</b> |
|--------------------|------------------------------|
| 0.332              | -0.144 to 0.683              |

| <b>Correlation</b> | <b>95% CI of Correlation</b> |
|--------------------|------------------------------|
| 0.433              | -0.026 to 0.741              |

| <b>Correlation</b> | <b>95% CI of Correlation</b> |
|--------------------|------------------------------|
| 0.203              | -0.263 to 0.592              |
